# Supplementary material for: Pericardial Adipose Tissue–Derived Leptin Promotes Myocardial Apoptosis in High‐Fat Diet–Induced Obese Rats Through Janus Kinase 2/Reactive Oxygen Species/Na+/K+‐ATPase Signaling Pathway
Source: PubMed Central journal article supplement — J Am Heart Assoc. 2021 Sep 6;10(18):e021369. doi: 10.1161/JAHA.121.021369 (PMC8649551; doi:10.1161/jaha.121.021369), 2021-09-06

## **SUPPLEMENTAL MATERIAL**

**Table S1. Baseline metabolic parameters of the two experimental groups of rats.**

| Metabolic parameters | Baseline (0 week) |             |
|----------------------|-------------------|-------------|
|                      | ND (n=10)         | HFD (n=10)  |
| Body mass (g)        | 250.34±10.26      | 254.70±9.13 |
| FBG (mmol/L)         | 4.66±0.26         | 5.01±0.23   |
| FINS (ng/mL)         | 0.48±0.09         | 0.53±0.06   |
| HOMA-IR              | 2.63±0.26         | 2.33±0.63   |
| TC (mmol/L)          | 1.83±0.18         | 2.03±0.41   |
| TG (mmol/L)          | 0.93±0.25         | 1.02±0.11   |
| HDL-C (mmol/L)       | 1.45±0.17         | 1.63±0.22   |
| LDL-C (mmol/L)       | 0.72±0.12         | 0.83±0.18   |

There was no difference in baseline data between the two groups (t-test for all; data presented as mean±SD). FBG, fasting blood glucose; FINS, fasting insulin; HOMA-IR, homeostasis model assessment of insulin resistance; TC, total cholesterol; TG, triglyceride; HDL-C, high-density lipoprotein; LDL-C, low-density lipoprotein.

**Table S2. Metabolic parameters of two experimental groups after diet treatment for 20 weeks.**

| Metabolic parameters | 20 weeks      |                |
|----------------------|---------------|----------------|
|                      | Control (n=8) | Obese (n=7)    |
| Food intake (g/week) | 71.09±17.09   | 68.57±17.67    |
| Body mass (g)        | 501.33±65.26* | 641.38±132.58* |
| SBP (mm/Hg)          | 99.00±10.64   | 109.70±33.78   |
| DBP (mm/Hg)          | 66.83±15.36   | 65.00±11.27    |
| FBG (mmol/L)         | 4.39±0.52     | 7.45±0.81*     |
| FINS (ng/mL)         | 0.49±0.04     | 1.33±0.15*     |
| HOMA-IR              | 2.89±1.21     | 8.02±1.36**    |
| TC (mmol/L)          | 1.79±0.32     | 2.91±0.43**    |
| TG (mmol/L)          | 0.96±0.06     | 2.03±0.58*     |
| HDL-C (mmol/L)       | 1.56±0.13     | 1.02±0.09*     |
| LDL-C (mmol/L)       | 0.68±0.15     | 1.47±0.21**    |

After 20-week of high fat diet feeding, HFD rats were obese, hyperglycemic, hyperlipidemic, and insulin resistant (\* =  $p < 0.05$  vs. Control group, \*\* =  $p < 0.01$  vs. Control group; t-test for all; data presented as mean±SD). FBG, fasting blood glucose; FINS, fasting insulin; HOMA-IR, homeostasis model assessment of insulin resistance; TC, total cholesterol; TG, triglyceride; HDL-C, high-density lipoprotein; LDL-C, low-density lipoprotein.

**Figure. S1 Western blot analysis of leptin expression of PAT from control and obese rats. (\*\*\*) $p < 0.001$  vs. con-PAT; t-test, n=3/group).**

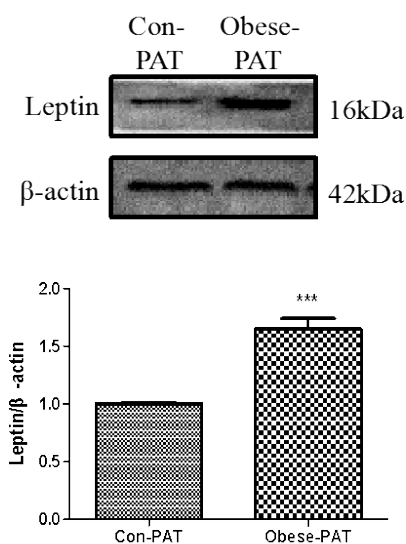

**Figure S2. Long-term leptin administration induces H9c2 cell apoptosis.** H9c2 cells were incubated by different concentrations of leptin at various time periods. Cell viability was measured by methyl thiazolyl tetrazolium (MTT) method. a-k Effects of time and concentration gradient of leptin on H9c2 cell proliferation. l-m Western blot analysis of caspase 3 protein expression after 24 or 48h of leptin intervention. (\*p<0.05 vs. 0ng/ml; \*\*p<0.01 vs. 0ng/ml; \*\*\*p<0.001 vs. 0ng/ml; &p<0.001 vs. 24h (0ng/ml); #p<0.05 vs. 48h (0ng/ml); 1-way ANOVA with Bonferroni correction for A-K, two-way ANOVA analysis of variance for M; data presented as mean±SEM). For A-K, n=6/group; for M, n=3/group.

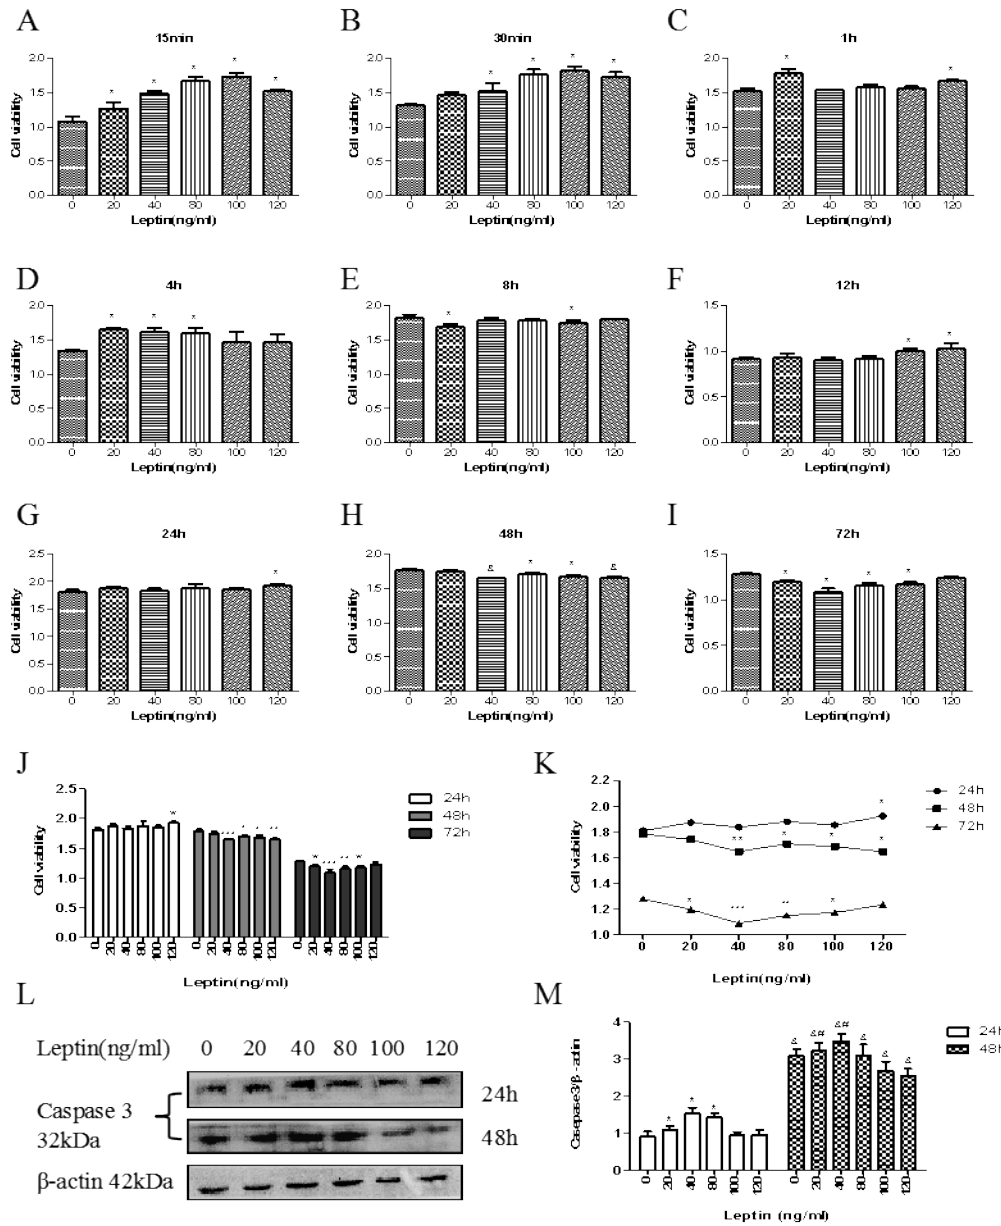

Supplement: JAH3-10-e021369-s001.pdf [file JAH3-10-e021369-s001.pdf]
